# Supplementary material for: Dual Standards of Care: COVID-19 Status and Breastfeeding Support Inequities in Brazilian Baby-Friendly Hospitals
Source: Research Square preprint supplement (doi:10.21203/rs.3.rs-7032455/v1), 2025-07-27
Supplement: Supplementary file 1 [file 7f68ee44568da755a5f25f38.pdf]

# QUESTIONNAIRE ON THE PROTOCOL FOR COVID-19 CONTROL AND MAINTENANCE OF BREASTFEEDING PRACTICES

## FILLING INSTRUCTIONS:

This questionnaire is structured to be answered in 6 parts, considering the COVID-19 pandemic: (1) Information about the Center, (2) About the Management of Breastfeeding Practices, (3) About General Recommendations, (4) About Recommendations in the Delivery Room, (5) About Recommendations in the Immediate Postpartum Period, and (6) About Recommendations in the Home Environment.

For parts 1 and 2, all questions are related to the center and the management of breastfeeding practices. For parts 3 to 6, all questions are about the center's recommendations for the COVID-19 POSITIVE and/or SUSPECTED mother-infant dyad and for the COVID-19 NEGATIVE and/or NON-SUSPECTED mother-infant dyad.

Answer yes or no for categorical questions and, when necessary, describe the requested information.

---

### 1. About the Center

|   | Question                                                                                                                                                                             | Yes | No |
|---|--------------------------------------------------------------------------------------------------------------------------------------------------------------------------------------|-----|----|
| 1 | Does it have its own local protocol, adapted and developed for facing COVID-19 in the maternity ward?                                                                                |     |    |
| 2 | Answer only if you marked "NO" in question 1: if it does not have its own protocol, does it use guidelines from Brazilian or International Societies on conduct in case of COVID-19? |     |    |
| 3 | Answer only if you marked "YES" in question 2: does it follow the recommendation of any of the societies listed below?                                                               |     |    |
|   | Chinese Pediatrics COVID-19 Working Group                                                                                                                                            |     |    |
|   | World Health Organization (WHO)                                                                                                                                                      |     |    |
|   | United Nations Children's Fund (UNICEF)                                                                                                                                              |     |    |
|   | Centers for Disease Control and Prevention (CDC)                                                                                                                                     |     |    |
|   | Royal College of Obstetricians & Gynecologists (RCOG)                                                                                                                                |     |    |
|   | Academy of Breastfeeding Medicine (ABM)                                                                                                                                              |     |    |

|    | Question                                                                                                          | Yes | No |
|----|-------------------------------------------------------------------------------------------------------------------|-----|----|
|    | Brazilian Society of Pediatrics (SBP)                                                                             |     |    |
|    | Brazilian Human Milk Bank Network (RBLH)                                                                          |     |    |
| 4  | Has the center become a reference for pregnant women with COVID-19?                                               |     |    |
| 5  | Is the center a university hospital?                                                                              |     |    |
| 6  | Is it a reference center for high-risk pregnant women?                                                            |     |    |
| 7  | Does the center have a maternal ICU?                                                                              |     |    |
| 8  | Does the center have a Neonatal ICU?                                                                              |     |    |
| 9  | What is the average number of births per year? :                                                                  |     |    |
| 10 | What is the average number of cesarean births per year? :                                                         |     |    |
| 11 | How many pregnant women with COVID-19 have been attended at the center since the beginning of the pandemic? :     |     |    |
| 12 | Has there been any death of a pregnant woman with COVID-19 since the beginning of the pandemic? If yes, how many? |     |    |
| 13 | Method currently used for testing pregnant women and babies with suspected COVID-19:                              |     |    |

---

## 2. About the Management of Breastfeeding Practices during the COVID-19 pandemic

|    | Question                                                                                          | Yes | No |
|----|---------------------------------------------------------------------------------------------------|-----|----|
| 14 | Does it currently follow the International Code of Marketing of Breast-milk Substitutes?          |     |    |
| 15 | Does it have a written infant feeding policy that is routinely communicated to staff and parents? |     |    |
| 16 | Does it maintain a continuous system for monitoring and managing data related to breastfeeding?   |     |    |
| 17 | Does it promote staff training for knowledge, competence, and skills to support breastfeeding?    |     |    |

---

### 3. GENERAL Recommendations during the COVID-19 Pandemic

|    | Question                                                                                                      | COVID-19 POSITIVE<br>and/or SUSPECTED<br>Mother-Infant Dyad | COVID-19 NEGATIVE<br>and/or NON-<br>SUSPECTED Mother-<br>Infant Dyad |
|----|---------------------------------------------------------------------------------------------------------------|-------------------------------------------------------------|----------------------------------------------------------------------|
|    |                                                                                                               | Yes                                                         | No                                                                   |
| 18 | Do they recommend discussing the importance and management of breastfeeding with pregnant women and families? |                                                             |                                                                      |
| 19 | Do they recommend immediate and uninterrupted skin-to-skin contact?                                           |                                                             |                                                                      |
| 20 | Do they recommend mothers to start breastfeeding as soon as possible after birth?                             |                                                             |                                                                      |
| 21 | Do they recommend mothers to initiate and maintain breastfeeding and manage common difficulties?              |                                                             |                                                                      |
| 22 | Do they recommend exclusive breastfeeding, providing other foods or liquids only with clinical indication?    |                                                             |                                                                      |
| 23 | Do they recommend that mothers and children stay together and practice 24h rooming-in?                        |                                                             |                                                                      |
| 24 | Do they recommend helping mothers recognize their babies' feeding needs?                                      |                                                             |                                                                      |
| 25 | Do they recommend counseling mothers about the use and risks of bottles, nipples, and pacifiers?              |                                                             |                                                                      |

|    | Question                                                                                              | COVID-19 POSITIVE<br>and/or SUSPECTED<br>Mother-Infant Dyad | COVID-19 NEGATIVE<br>and/or NON-<br>SUSPECTED Mother-<br>Infant Dyad |
|----|-------------------------------------------------------------------------------------------------------|-------------------------------------------------------------|----------------------------------------------------------------------|
| 26 | Do they recommend discharge guidelines so that parents and children have continuous support and care? |                                                             |                                                                      |

---

#### 4. Recommendations in the DELIVERY ROOM during the COVID-19 Pandemic

|    | Question                                                                                       | COVID-19 POSITIVE<br>and/or SUSPECTED<br>Mother-Infant Dyad | COVID-19 NEGATIVE<br>and/or NON-<br>SUSPECTED Mother-<br>Infant Dyad |
|----|------------------------------------------------------------------------------------------------|-------------------------------------------------------------|----------------------------------------------------------------------|
|    |                                                                                                | Yes                                                         | No                                                                   |
| 27 | Do they recommend early clamping?                                                              |                                                             |                                                                      |
| 28 | Do they recommend delayed clamping?                                                            |                                                             |                                                                      |
| 29 | Do they recommend the presence of a companion in the delivery room?                            |                                                             |                                                                      |
| 30 | Do they recommend breastfeeding in the delivery room?                                          |                                                             |                                                                      |
| 31 | Do they recommend the use of full PPE (N95) or partial (surgical mask) for the medical team?   |                                                             |                                                                      |
| 32 | Do they recommend the use of full PPE (N95) or partial (surgical mask) for the pregnant woman? |                                                             |                                                                      |
| 33 | Do they recommend distinct                                                                     |                                                             |                                                                      |

|    | Question                                                               | COVID-19 POSITIVE<br>and/or SUSPECTED<br>Mother-Infant Dyad | COVID-19 NEGATIVE<br>and/or NON-<br>SUSPECTED Mother-<br>Infant Dyad |
|----|------------------------------------------------------------------------|-------------------------------------------------------------|----------------------------------------------------------------------|
|    | protection conduct for<br>cesarean births?                             |                                                             |                                                                      |
| 34 | Do they recommend distinct<br>protection conduct for<br>normal births? |                                                             |                                                                      |

---

### 5. Recommendations in the IMMEDIATE POSTPARTUM period during the COVID-19 Pandemic

|    | Question                                                                                                   | COVID-19 POSITIVE<br>and/or SUSPECTED<br>Mother-Infant Dyad | COVID-19 NEGATIVE<br>and/or NON-<br>SUSPECTED Mother-<br>Infant Dyad |
|----|------------------------------------------------------------------------------------------------------------|-------------------------------------------------------------|----------------------------------------------------------------------|
|    |                                                                                                            | Yes                                                         | No                                                                   |
| 35 | Do they recommend on-<br>demand breastfeeding?                                                             |                                                             |                                                                      |
| 36 | Do they recommend<br>breastfeeding only every 3<br>hours?                                                  |                                                             |                                                                      |
| 37 | Do they recommend a<br>minimum distance between<br>neonate and mother during<br>non-breastfeeding periods? |                                                             |                                                                      |
| 38 | What type of accommodation<br>is recommended for the<br>mother-infant dyad?                                |                                                             |                                                                      |
|    | Individual room                                                                                            |                                                             |                                                                      |
|    | Postpartum ward                                                                                            |                                                             |                                                                      |
|    | Neonate stays in a separate unit<br>from the mother with                                                   |                                                             |                                                                      |

|    | Question                                                                                  | COVID-19 POSITIVE<br>and/or SUSPECTED<br>Mother-Infant Dyad | COVID-19 NEGATIVE<br>and/or NON-<br>SUSPECTED Mother-<br>Infant Dyad |
|----|-------------------------------------------------------------------------------------------|-------------------------------------------------------------|----------------------------------------------------------------------|
|    | breastfeeding allowed                                                                     |                                                             |                                                                      |
|    | Neonate stays in a separate unit<br>from the mother where<br>breastfeeding is not allowed |                                                             |                                                                      |
| 39 | During breastfeeding in a<br>hospital setting, is it<br>recommended:                      |                                                             |                                                                      |
|    | Use of mask for breastfeeding?                                                            |                                                             |                                                                      |
|    | Hand washing before feeding?                                                              |                                                             |                                                                      |
|    | Face washing before feeding?                                                              |                                                             |                                                                      |
|    | Changing clothes for<br>breastfeeding?                                                    |                                                             |                                                                      |
|    | Guidance on breast washing?                                                               |                                                             |                                                                      |
| 40 | Do they recommend milk<br>expression if necessary (raw<br>milk)?                          |                                                             |                                                                      |
|    | Location where expression is<br>performed:                                                |                                                             |                                                                      |
| 41 | How is raw milk recommended<br>to be offered?                                             |                                                             |                                                                      |
|    | Bottle                                                                                    |                                                             |                                                                      |
|    | Cup                                                                                       |                                                             |                                                                      |
|    | Finger feeding                                                                            |                                                             |                                                                      |
| 42 | Do they offer formula in a<br>bottle or cup?                                              |                                                             |                                                                      |
| 43 | Do they recommend milk<br>pasteurization?                                                 |                                                             |                                                                      |

|    | Question                                                                    | COVID-19 POSITIVE<br>and/or SUSPECTED<br>Mother-Infant Dyad | COVID-19 NEGATIVE<br>and/or NON-<br>SUSPECTED Mother-<br>Infant Dyad |
|----|-----------------------------------------------------------------------------|-------------------------------------------------------------|----------------------------------------------------------------------|
| 44 | Do they recommend mothers to be milk donors?                                |                                                             |                                                                      |
| 45 | Do they recommend visits for the mother-infant dyad?                        |                                                             |                                                                      |
| 46 | In normal situations, how long (hours) is the dyad's discharge recommended? |                                                             |                                                                      |
| 47 | What exam do they recommend for mother screening?                           |                                                             |                                                                      |
| 48 | Do they perform an exam for neonate screening? Which exam?                  |                                                             |                                                                      |
| 49 | Do they recommend psychological support if necessary?                       |                                                             |                                                                      |

---

## 6. Recommendations for the HOME ENVIRONMENT during the COVID-19 Pandemic

|    | Question                                                                  | COVID-19 POSITIVE<br>and/or SUSPECTED<br>Mother-Infant Dyad | COVID-19 NEGATIVE<br>and/or NON-<br>SUSPECTED Mother-<br>Infant Dyad |
|----|---------------------------------------------------------------------------|-------------------------------------------------------------|----------------------------------------------------------------------|
|    |                                                                           | Yes                                                         | No                                                                   |
| 50 | Do they recommend separation between mother and baby?                     |                                                             |                                                                      |
| 51 | Do they recommend maintaining a 2-meter distance between mother and baby? |                                                             |                                                                      |

|    | Question                                                                                                         | COVID-19 POSITIVE<br>and/or SUSPECTED<br>Mother-Infant Dyad | COVID-19 NEGATIVE<br>and/or NON-<br>SUSPECTED Mother-<br>Infant Dyad |
|----|------------------------------------------------------------------------------------------------------------------|-------------------------------------------------------------|----------------------------------------------------------------------|
| 52 | Do they recommend hand washing before breastfeeding?                                                             |                                                             |                                                                      |
| 53 | Do they recommend hand washing always before handling the baby?                                                  |                                                             |                                                                      |
| 54 | If the neonate has infant colic and/or cries, do they recommend the mother to hold the baby for comfort periods? |                                                             |                                                                      |
| 55 | Do they recommend care regarding crying and comfort for the dyad?                                                |                                                             |                                                                      |
| 56 | Do they recommend that other care be performed by another person (diaper change, bath)?                          |                                                             |                                                                      |
| 57 | Do they recommend on-demand feeding or breastfeeding every 3 hours?                                              |                                                             |                                                                      |
| 58 | Do they recommend home expression and offering raw milk?                                                         |                                                             |                                                                      |
| 59 | Do they recommend prescription of starter formula (formula prescription at discharge, for use if necessary)?     |                                                             |                                                                      |
| 60 | Do they recommend measures for maintaining, stimulating lactation, and preventing weaning?                       |                                                             |                                                                      |
| 61 | Do they provide informative material (virtual or printed)                                                        |                                                             |                                                                      |



|    | Question                                                                                                       | COVID-19 POSITIVE<br>and/or SUSPECTED<br>Mother-Infant Dyad | COVID-19 NEGATIVE<br>and/or NON-<br>SUSPECTED Mother-<br>Infant Dyad |
|----|----------------------------------------------------------------------------------------------------------------|-------------------------------------------------------------|----------------------------------------------------------------------|
|    | about breastfeeding and<br>COVID?                                                                              |                                                             |                                                                      |
| 62 | Is there a home visit for<br>COVID dyads in the region?                                                        |                                                             |                                                                      |
| 63 | Is there scheduled telemedicine<br>care for these mothers?                                                     |                                                             |                                                                      |
| 64 | If there is difficulty with<br>breastfeeding at home, which<br>health unit should this dyad be<br>attended at? |                                                             |                                                                      |
|    | Regarding the performance of<br>BCG and heel prick test,<br>answer:                                            |                                                             |                                                                      |
| 65 | Do they advise performing<br>after the isolation period?                                                       |                                                             |                                                                      |
| 66 | Is there a specific unit to attend<br>this dyad?                                                               |                                                             |                                                                      |
| 67 | Do they perform home<br>collection and vaccination?                                                            |                                                             |                                                                      |
| 68 | Is psychological care (tele-<br>care) possible for these<br>mothers, if necessary?                             |                                                             |                                                                      |
| 69 | Are there specific guidelines<br>for the behavior of other<br>children?                                        |                                                             |                                                                      |
| 70 | Do they advise that other<br>children be kept away from the<br>newborn baby?                                   |                                                             |                                                                      |
